# Supplementary material for: Human Amniotic Fluid Mesenchymal Stem Cell-Derived Exosomes Inhibit Apoptosis in Ovarian Granulosa Cell via miR-369-3p/YAF2/PDCD5/p53 Pathway
Source: PubMed Central journal article supplement (PMC9346541; doi:10.1155/2022/3695848), 2022-07-26

**A.**

CD29

CD90

CD105

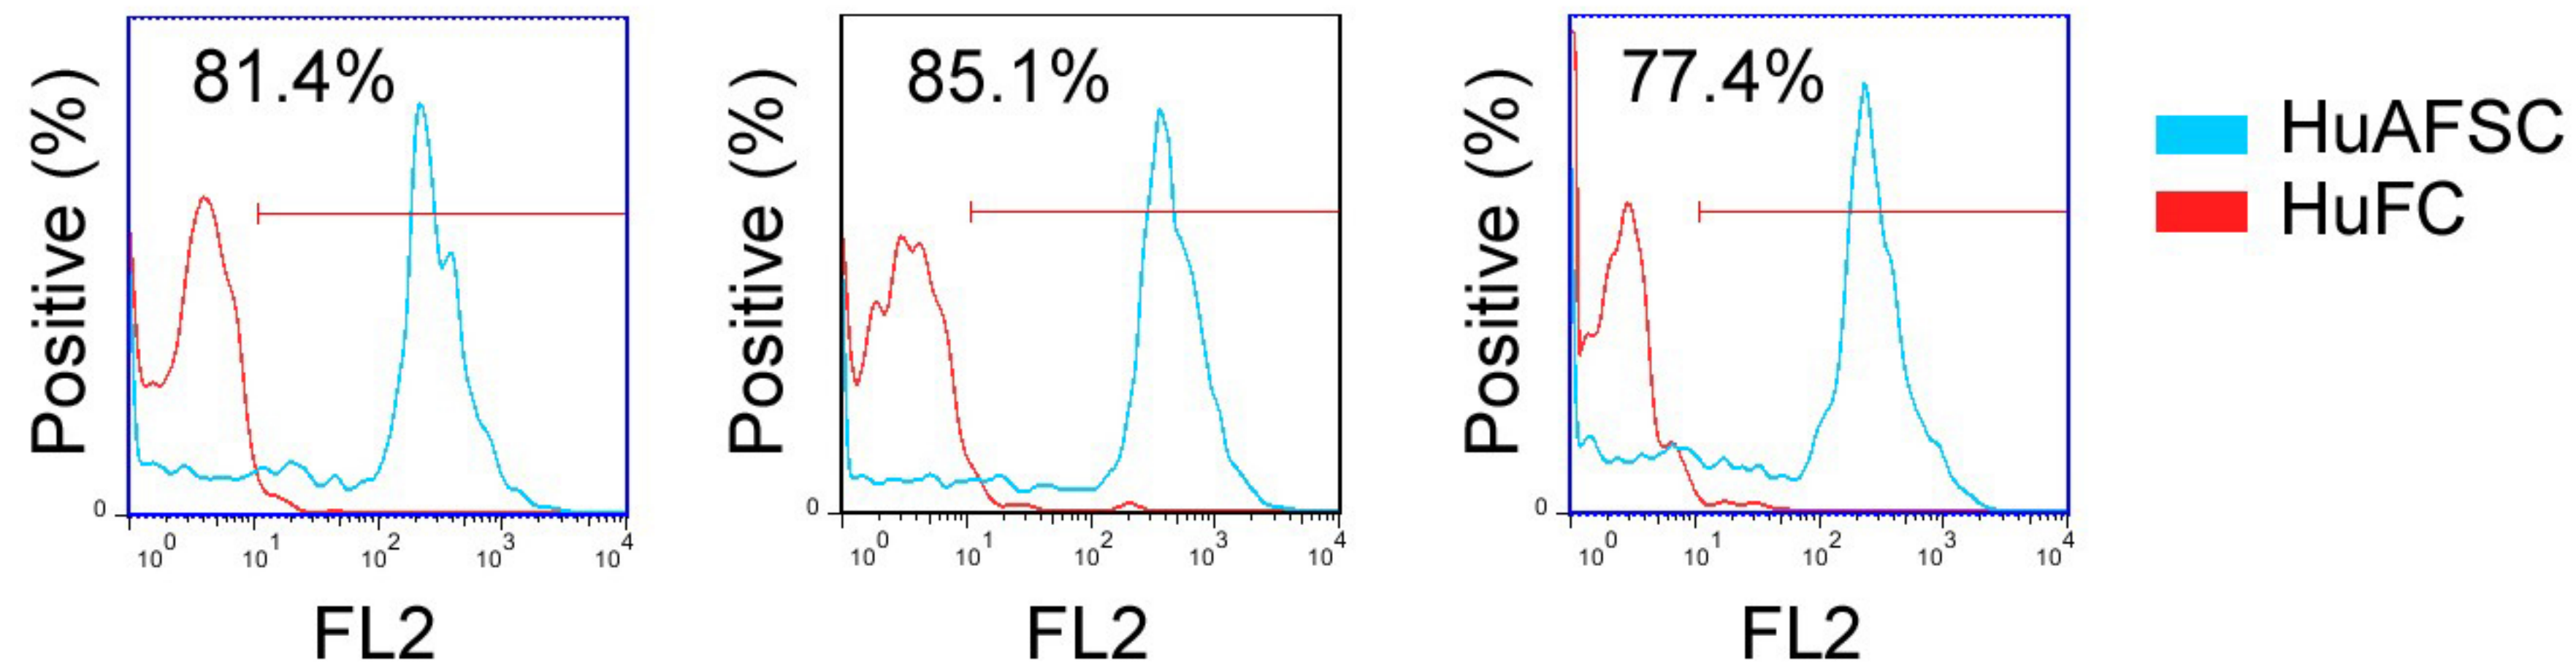**B.**

Alizarin Red S

Von Kossa

Oil Red O

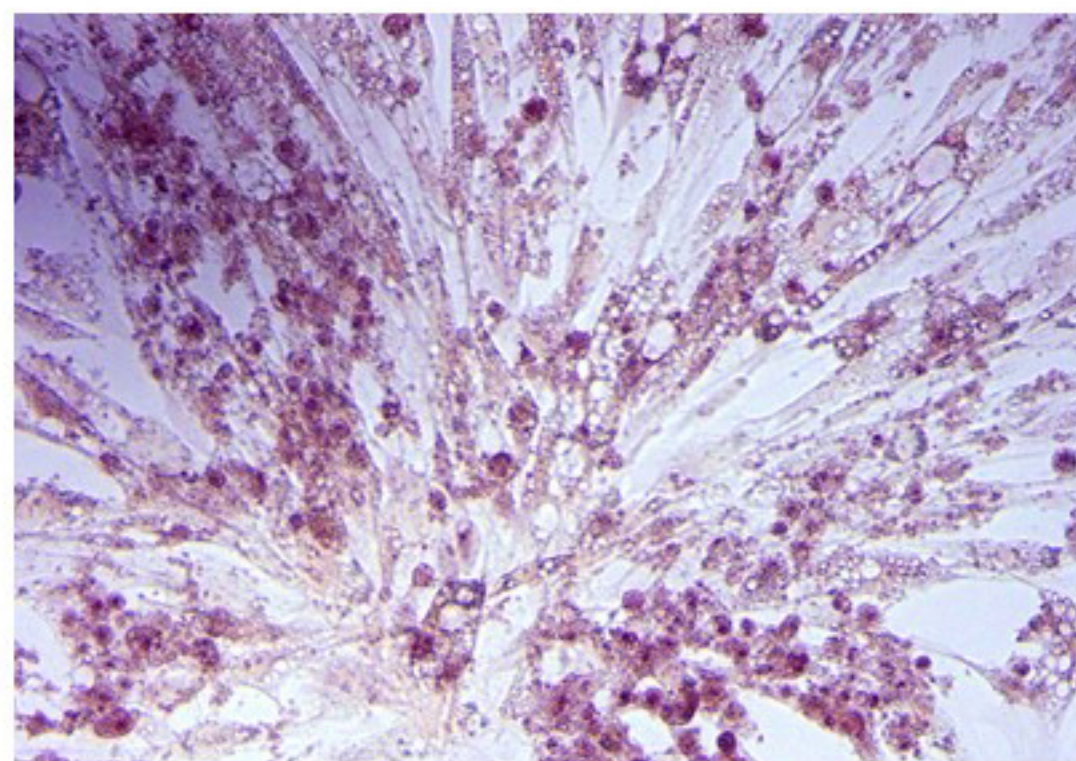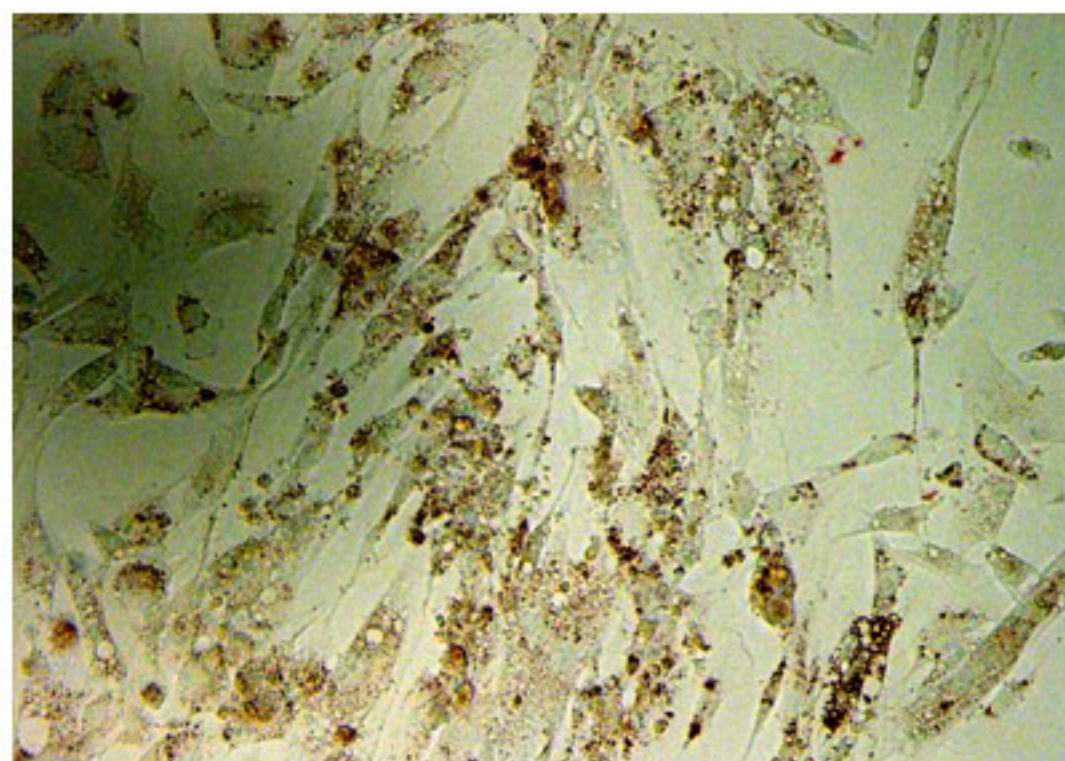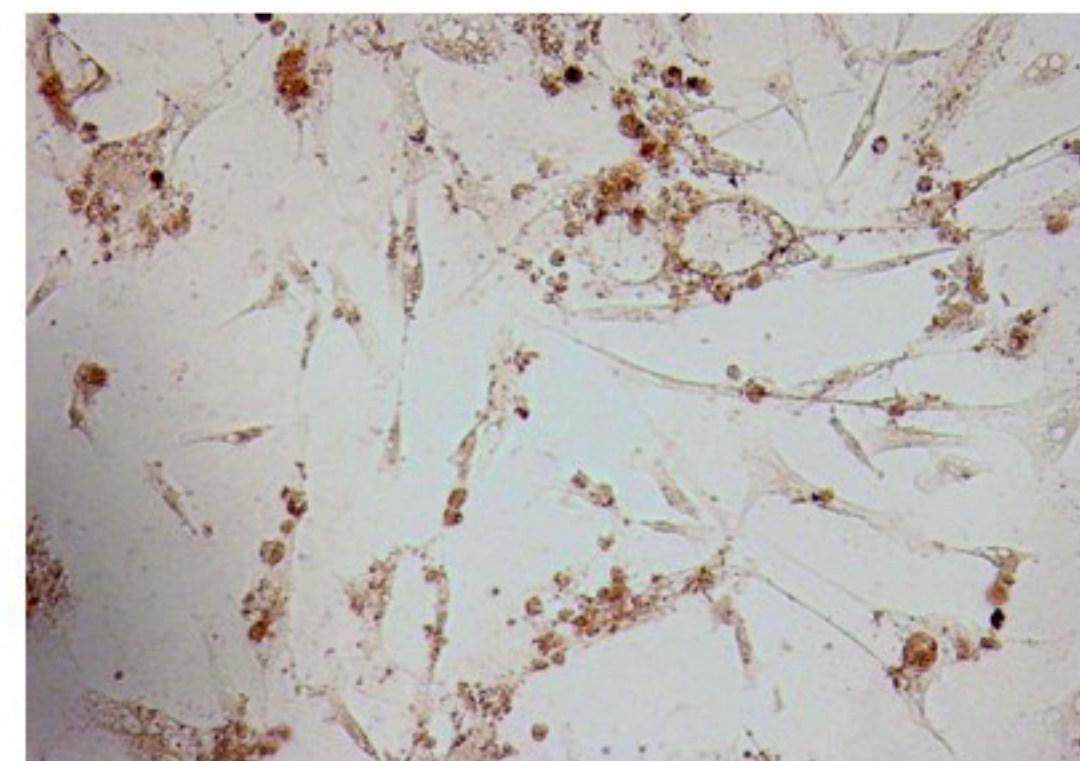

Supplement: 3695848.f1.pdf [file 3695848.f1.pdf]
